# Supplementary material
Source: publisher figshare collection journal article supplement (https://acs.figshare.com/ndownloader/files/6014121)
Supplement: Supplementary file 1 [file 6014121]

**Synthesis of Monometallic (Au and Pd) and Bimetallic (AuPd) Nanoparticles Using Carbon Nitride (C<sub>3</sub>N<sub>4</sub>) Quantum Dots via the Photochemical Route for Nitrophenol Reduction**

Pragati Fageria<sup>a</sup>, Shravan Uppala<sup>a</sup>, Roshan Nazir<sup>a</sup>, Subhashis Gangopadhyay<sup>b</sup>, Chien-Hsiang Chang<sup>c</sup>, Mrinmoyee Basu<sup>a</sup> and Surojit Pande<sup>\*a</sup>

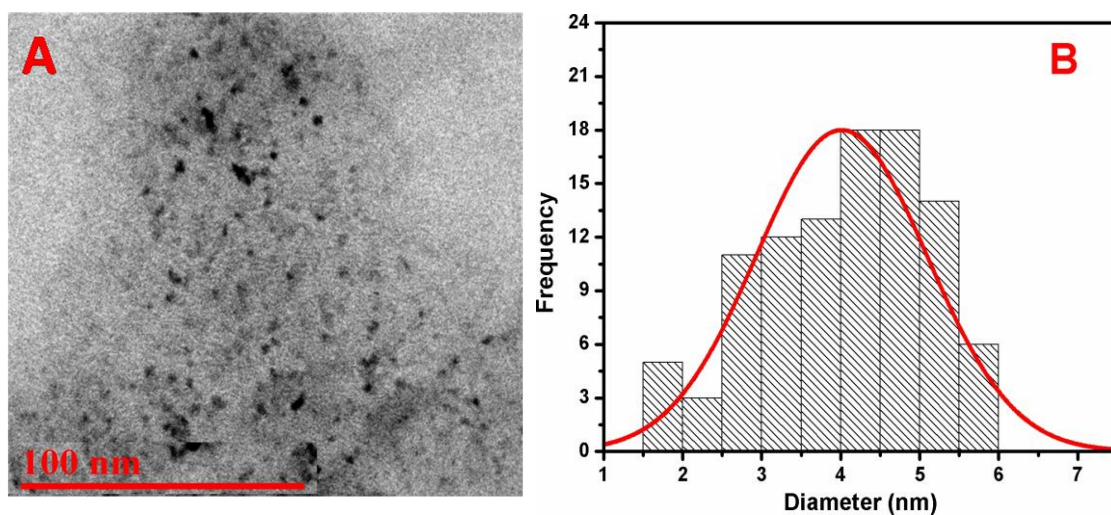

**Figure S1:** (a) TEM image of dialysed  $C_3N_4$  QDs solution prepared by urea and trisodium citrate (b) size-distribution histogram ( $4.5 \pm 1.1$  nm)

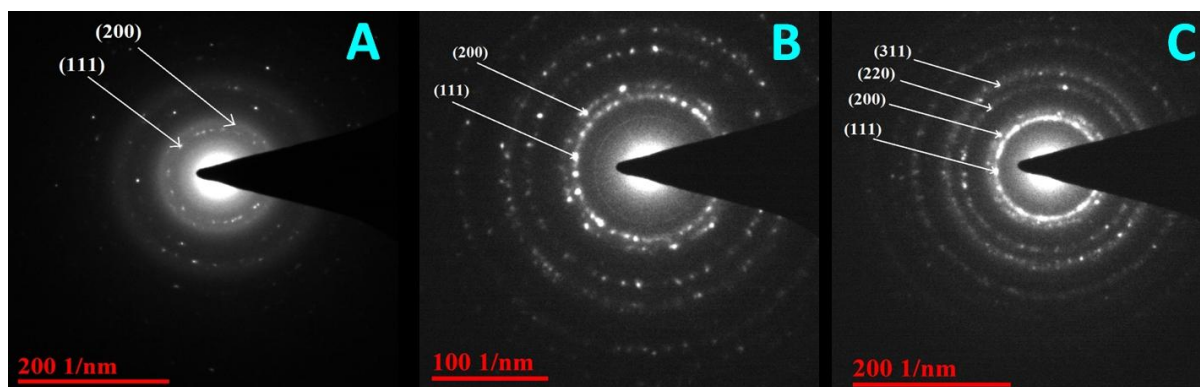

**Figure S2:** Selected area electron diffraction patterns in (a) Au, (b) Pd & (c) AuPd NPs.

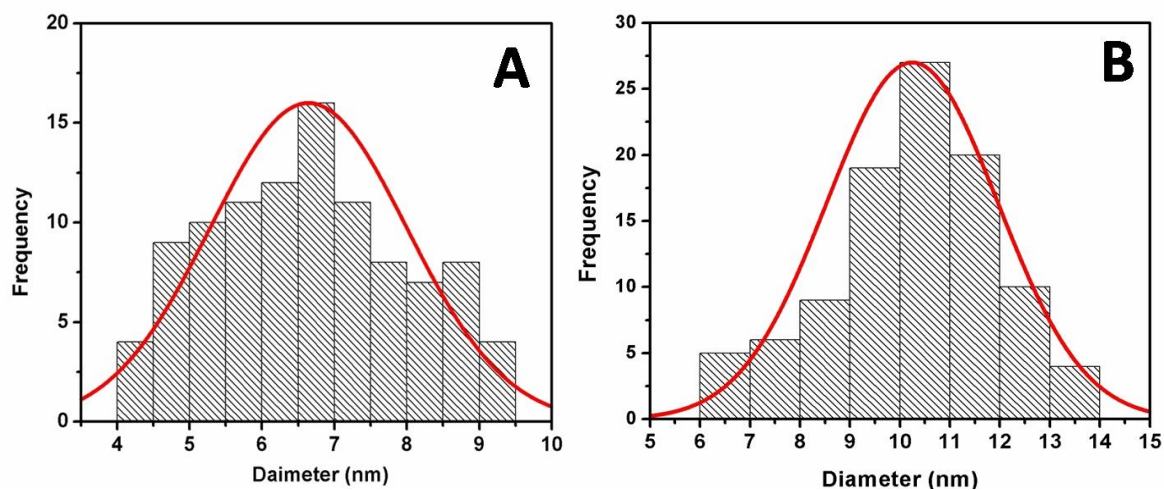

**Figure S3:** (a) Size-distribution histogram of Au NPs ( $6.8 \pm 1.3$  nm) and (b) size-distribution histogram of Pd NPs ( $10.1 \pm 1.2$  nm)

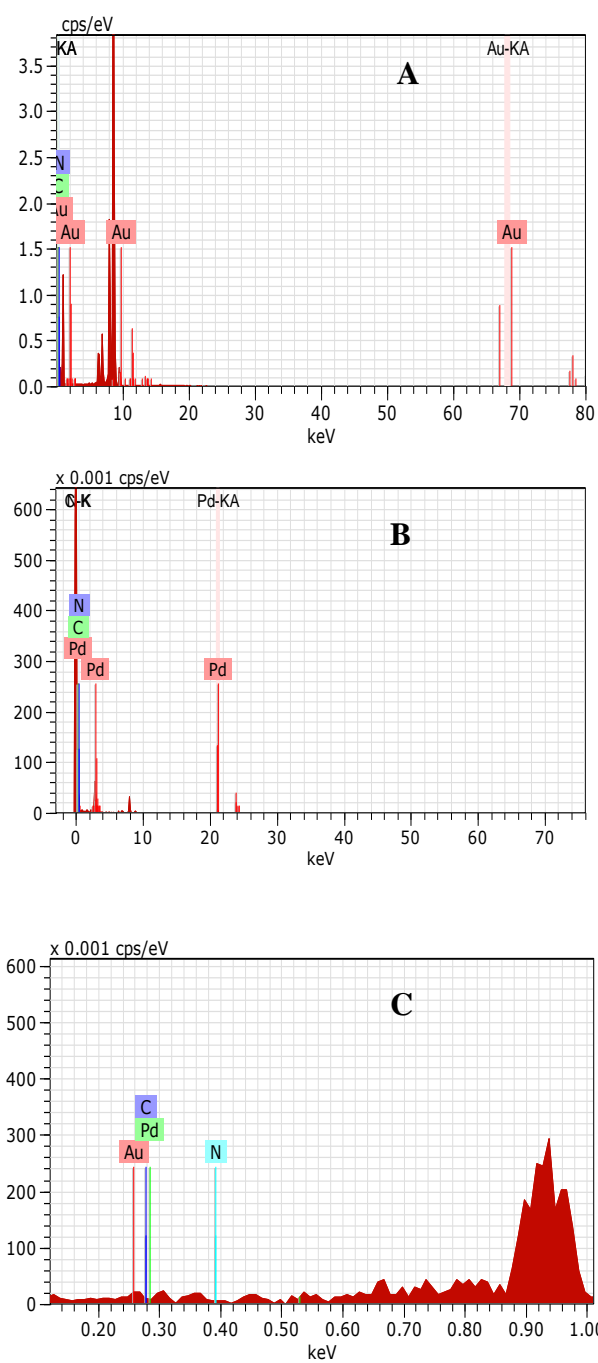

**Figure S4:** EDS spectra of (a) Au, (b) Pd & (c) AuPd NPs

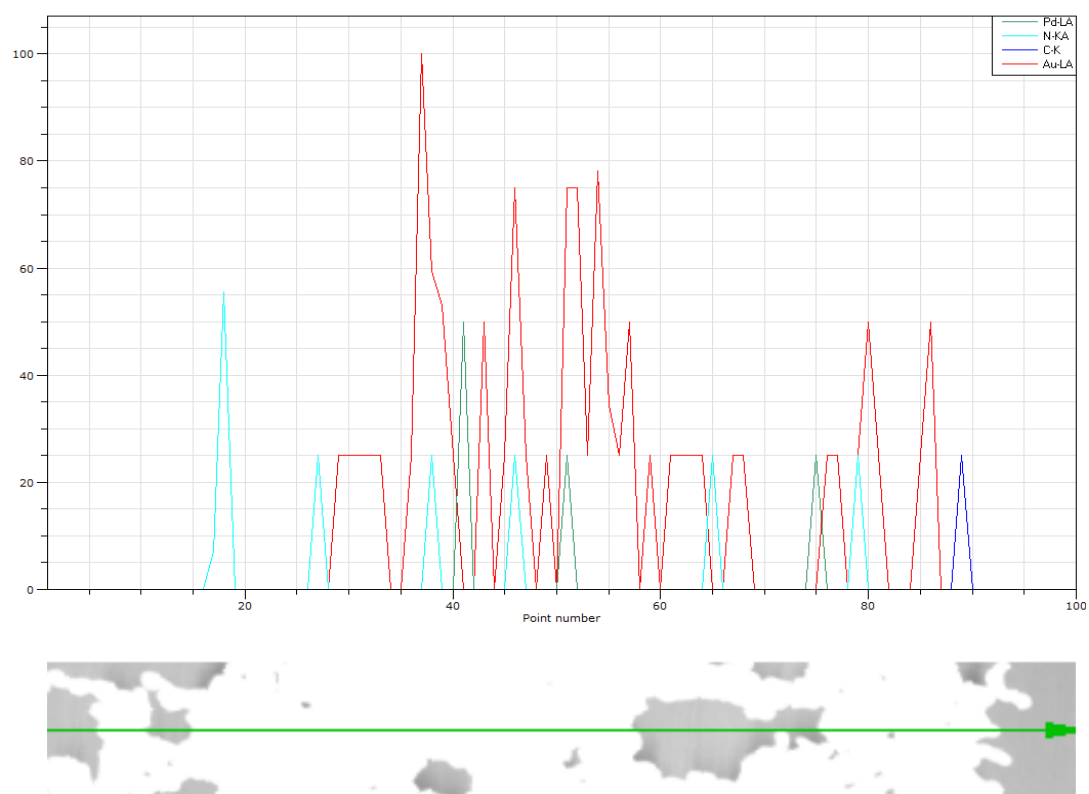

**Figure S5:** Line spectrum of AuPd NPs solution shows the presence of both Au and Pd nanoparticles with C and N from g-C<sub>3</sub>N<sub>4</sub>.

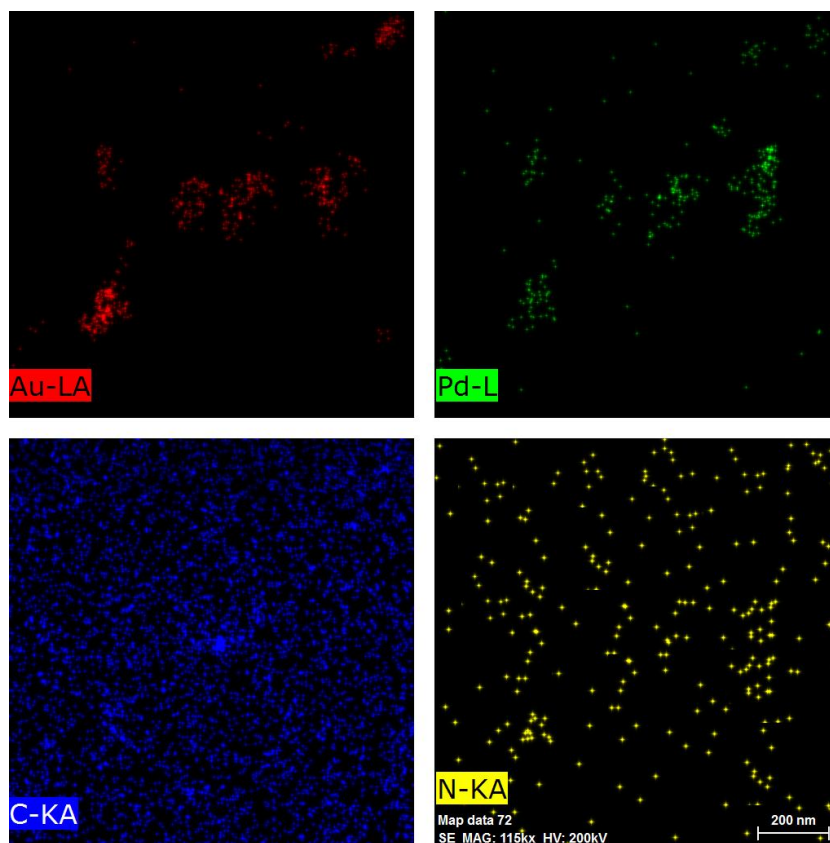

**Figure S6:** EDS mapping of AuPd alloy NPs shows the presence of both Au and Pd nanoparticles with C and N from  $C_3N_4$ .

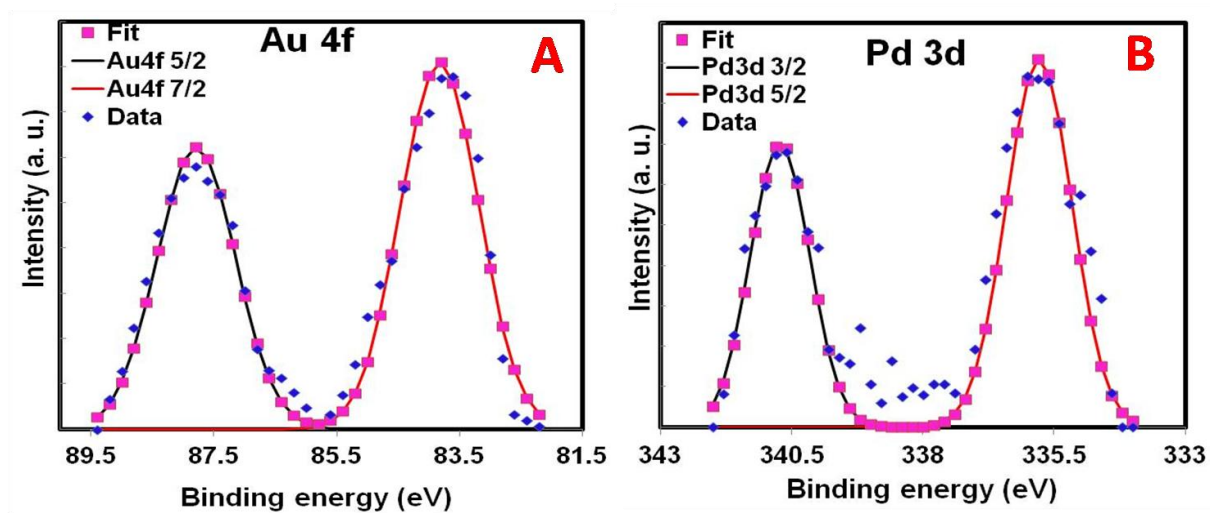

**Figure S7:** High resolution XPS spectra (a) Au 4f and (b) Pd 3d for Au and Pd NPs on g-C<sub>3</sub>N<sub>4</sub> structure, respectively.



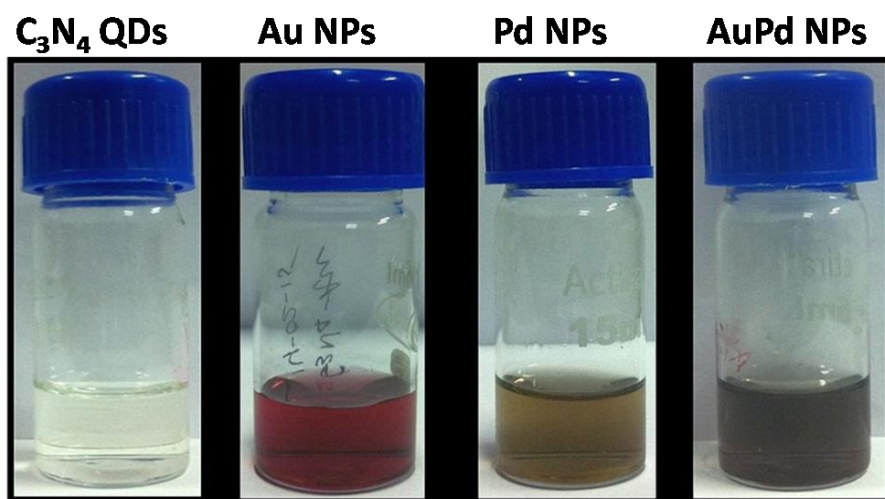

**Figure S8:** Digital photograph of  $C_3N_4$  QDs, Au, Pd and AuPd NPs

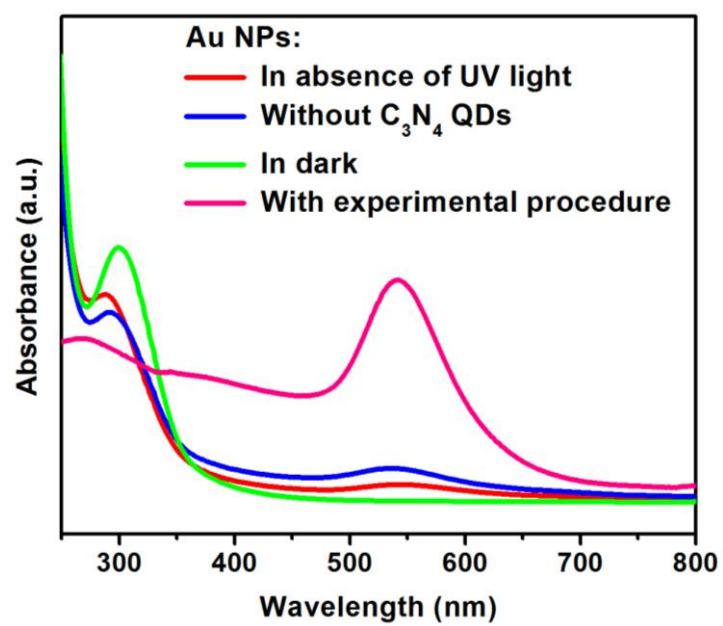

**Figure S9:** UV-vis of Au solution synthesized in different conditions (in absence of UV light, without C<sub>3</sub>N<sub>4</sub> QDs, in dark, and with experimental procedure)

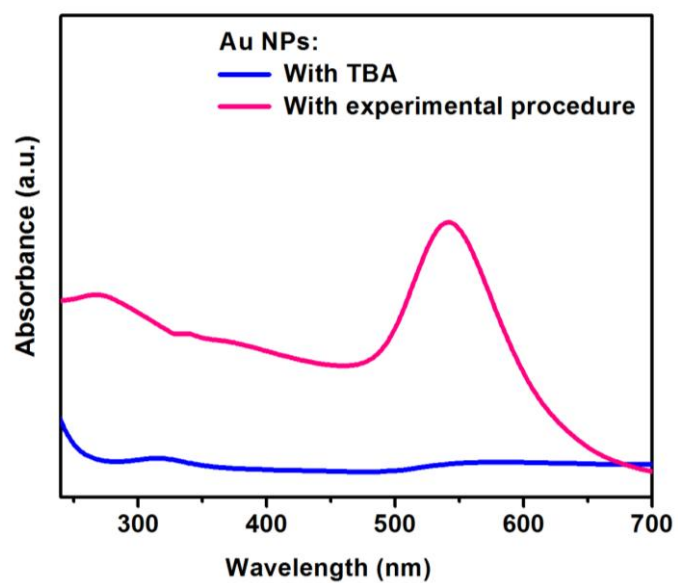

**Figure S10:** UV-vis of Au NPs solution synthesized in presence of an electron scavenger, Tert-butyl alcohol (TBA) and with experimental procedure (without electron scavenger).

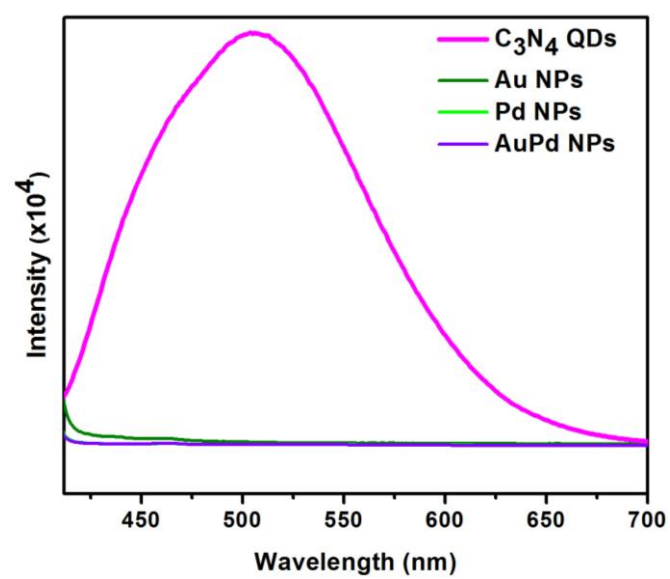

**Figure S11:** Comparative photoluminescence spectra of C<sub>3</sub>N<sub>4</sub> QD and Au, Pd, and AuPd NPs.

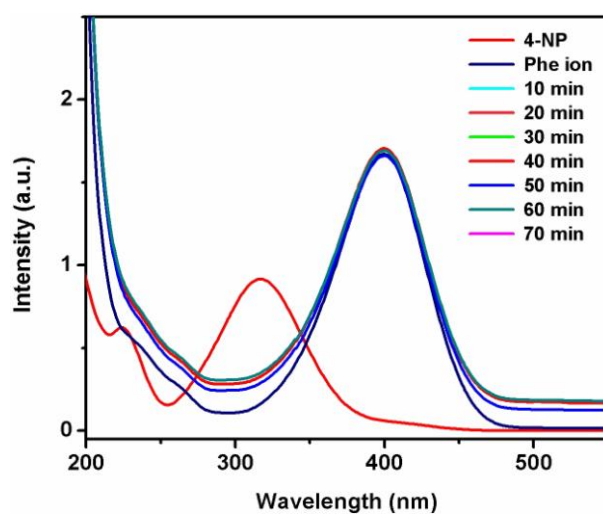

**Figure S12.** UV-vis spectra of 4-nitrophenol and 4-nitrophenolate ion after addition of  $\text{NaBH}_4$  in the absence of any catalyst

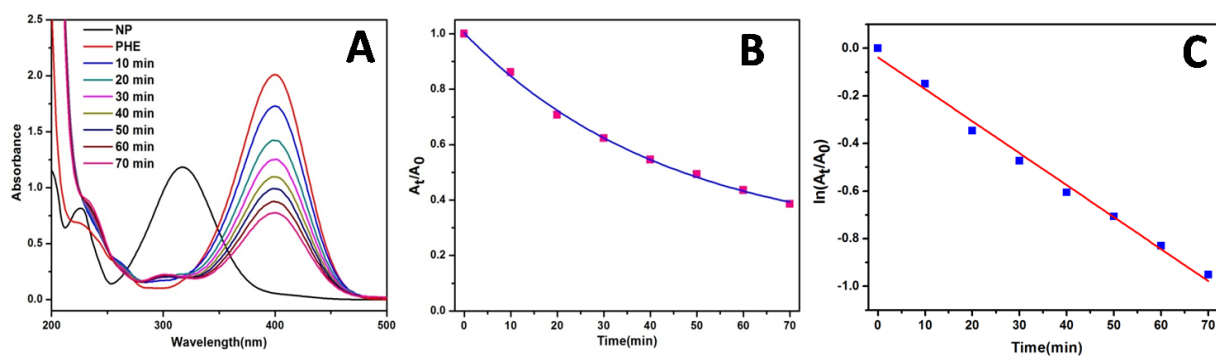

**Figure S13.** UV-vis spectra of (a) 4-nitrophenol reduction in presence of  $C_3N_4$  (b)  $A_t/A_0$  vs. time (min) plot (c)  $\ln(A_t/A_0)$  vs. time (min) plot. Conditions:  $[4\text{-NP}] = 10^{-4}$  M and amount of catalyst = 30  $\mu\text{L}$ .

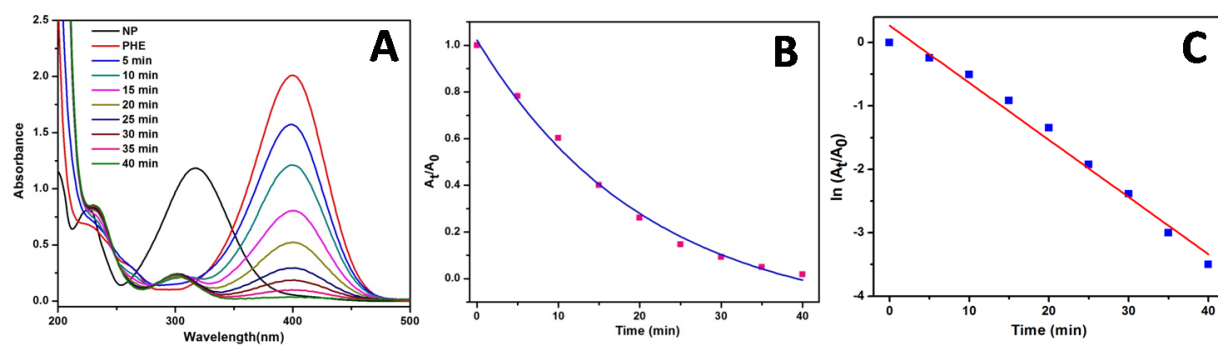

**Figure S14.** UV-vis spectra of (a) 4-nitrophenol reduction in presence of Au NPs (b)  $A_t/A_0$  vs. time (min) plot (c)  $\ln(A_t/A_0)$  vs. time (min) plot. Conditions:  $[4\text{-NP}] = 10^{-4}$  M and amount of catalyst = 30  $\mu\text{L}$ .

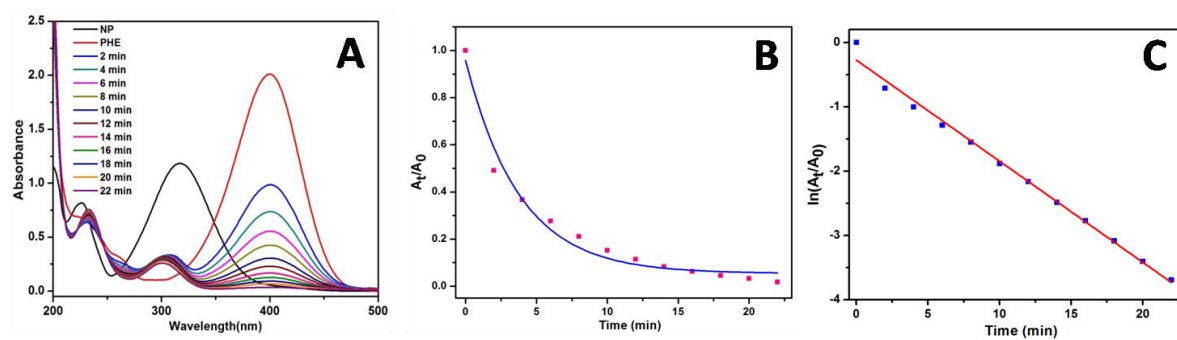

**Figure S15.** UV-vis spectra of (a) 4-nitrophenol reduction in presence of Pd NPs (b)  $A_t/A_0$  vs. time (min) plot (c)  $\ln(A_t/A_0)$  vs. time (min) plot. Conditions:  $[4\text{-NP}] = 10^{-4}$  M and amount of catalyst = 30  $\mu\text{L}$ .



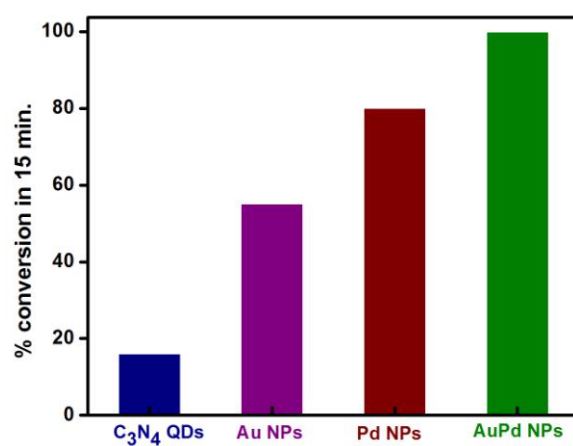

**Figure S16.** Comparative study of percent conversion from 4-NP to 4-AP in 15 min C<sub>3</sub>N<sub>4</sub> QDs, Au, Pd & AuPd NPs

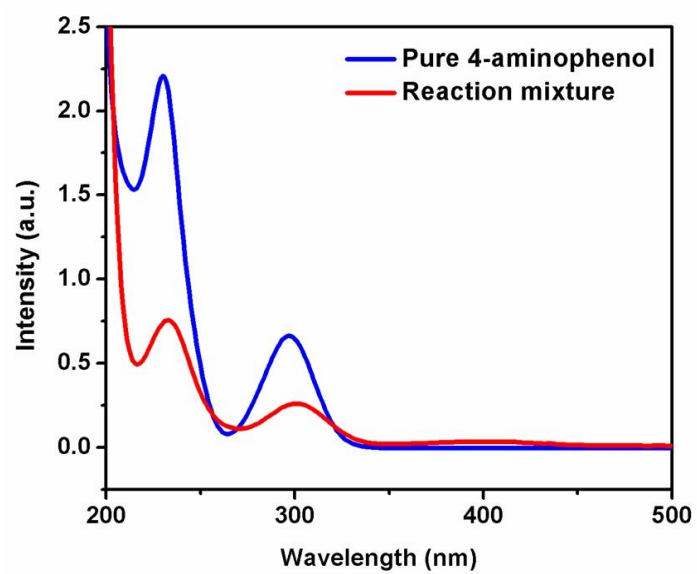

**Figure S17.** UV-vis spectra of pure 4-aminophenol and reaction mixture

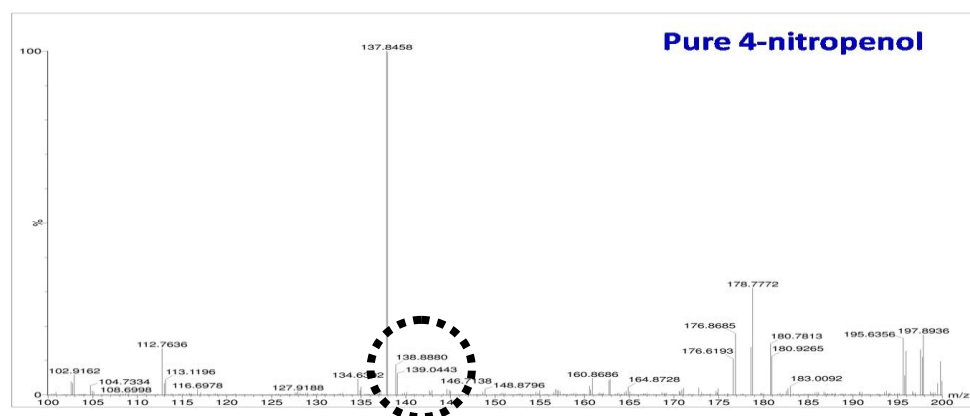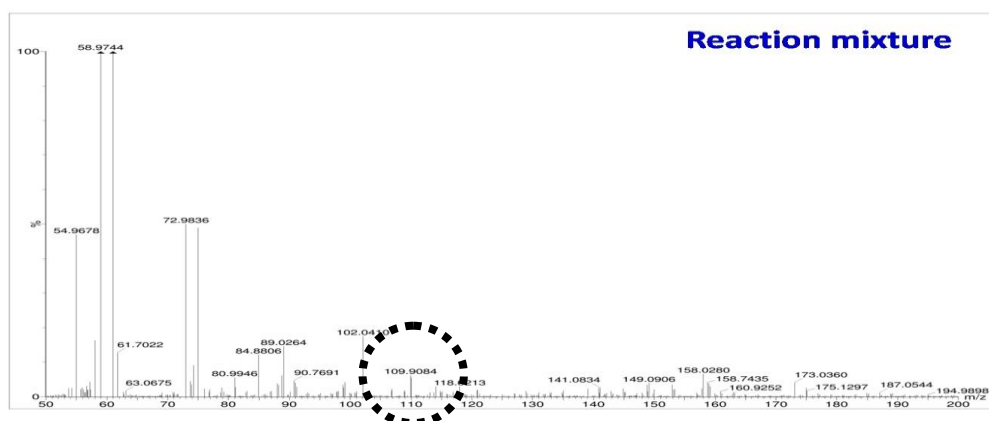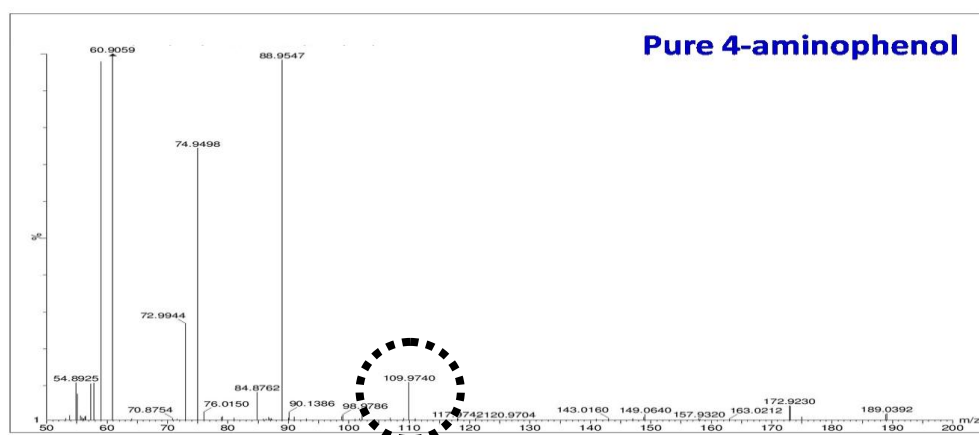

**Figure S18.** Mass spectra of pure 4-nitrophenol, reaction mixture and pure 4-aminophenol.

The molecular ion peak for all is encircled.
